# Supplementary material for: Theoretical Investigation on the “ON-OFF” Mechanism of a Fluorescent Probe for Thiophenols: Photoinduced Electron Transfer and Intramolecular Charge Transfer
Source: MDPI journal article supplement (doi:10.3390/molecules28196921), 2023-10-03
Supplement: s1 [file s1]

**Table S1.** Comparing calculated spectral data for DAPH based on different functionals (B3LYP, CAM-B3LYP, PBE0, and PBEPBE).

|                  |      | Energy (nm/eV) | f      | Contrib | CI    |
|------------------|------|----------------|--------|---------|-------|
| <b>B3LYP</b>     | Abs. | 498/2.49       | 1.4967 | H→L     | 99.2% |
|                  | Flu. | 579/2.14       | 1.7921 | H→L     | 99.0% |
| <b>CAM-B3LYP</b> | Abs. | 410/3.02       | 1.7215 | H→L     | 88.7% |
|                  | Flu. | 552/2.25       | 2.0580 | H→L     | 94.7% |
| <b>PBE0</b>      | Abs. | 478/2.59       | 1.5612 | H→L     | 98.9% |
|                  | Flu. | 565/2.19       | 1.9062 | H→L     | 98.5% |
| <b>PBEPBE</b>    | Abs. | 579/2.14       | 1.2802 | H→L     | 94.7% |
|                  | Flu. | 697/1.78       | 1.2523 | H→L     | 98.4% |

**Table S2.** Contribution of different segments of DAPH-DNP to the electron orbitals from S<sub>0</sub> to S<sub>1</sub> state and S<sub>2</sub> state (ωB97XD/TZVP/IEFPCM).

| Fragment             | Hole(%) | Electron(%) | Overlap(%) | Difference(%) |
|----------------------|---------|-------------|------------|---------------|
| <b>S<sub>1</sub></b> |         |             |            |               |
| 1                    | 21.63   | 34.48       | 27.31      | 12.84         |
| 2                    | 78.37   | 65.52       | 71.66      | -12.84        |
| <b>S<sub>2</sub></b> |         |             |            |               |
| 1                    | 96.87   | 67.32       | 80.76      | -29.55        |
| 2                    | 3.13    | 32.68       | 10.11      | 29.55         |

**Table S3.** The COSMO-ADC(2)/PTED computed vertical excitation energies (in eV) of DAPH-DAP.

|           | S <sub>0</sub> -min | LE-min | CT-min |
|-----------|---------------------|--------|--------|
| <b>LE</b> | 2.54                | 1.85   | 1.18   |
| <b>CT</b> | 3.00                | 2.40   | 0.08   |

**Table S4.** Contribution of different segments of DAPH to the electron orbitals from S<sub>0</sub> to S<sub>1</sub> state (ωB97XD/TZVP/IEFPCM).

| Fragment | Hole(%) | Electron(%) | Overlap(%) | Difference(%) |
|----------|---------|-------------|------------|---------------|
| 1        | 6.56    | 8.87        | 7.63       | 2.31          |
| 2        | 42.90   | 70.68       | 55.06      | 27.79         |
| 3        | 50.54   | 20.45       | 32.15      | -30.10        |

**Table S5.** Detailed theoretical and experimental spectral data for DAPH-DNP and DPAH (B3LYP/TZVP/IEFPCM).

|                 | Electronic transition          | Energy (nm/eV) | f      | Contrib | CI    | Exp (nm/eV) |
|-----------------|--------------------------------|----------------|--------|---------|-------|-------------|
| <b>DAPH-DNP</b> |                                |                |        |         |       |             |
| Absorption      | S <sub>0</sub> →S <sub>1</sub> | 711/1.74       | 0.0002 | H→L     | 89.6% | /           |
| Absorption      | S <sub>0</sub> →S <sub>2</sub> | 648/1.91       | 0.0145 | H→L+1   | 89.7% | /           |
| Absorption      | S <sub>0</sub> →S <sub>3</sub> | 473/2.62       | 1.4757 | H→L+2   | 98.5% | 447/2.77    |
| Emission        | S <sub>1</sub> →S <sub>0</sub> | 1468/0.84      | 0.0044 | L→H     | 99.5% | /           |
| Emission        | S <sub>2</sub> →S <sub>0</sub> | 1468/0.84      | 0.0044 | L→H     | 99.5% | /           |
| <b>DAPH</b>     |                                |                |        |         |       |             |
| Absorption      | S <sub>0</sub> →S <sub>1</sub> | 497/2.49       | 1.4867 | H→L     | 99.3% | 462/2.68    |
| Emission        | S <sub>1</sub> →S <sub>0</sub> | 581/2.14       | 1.7921 | H→L     | 99.0% | 654/1.90    |

**Table S6.** The calculated results of the excited states for DAPH-DNP and DAPH, including the centroid distance (D), the degree of overlap (Sr), the width distribution (H), degree of separation (t), hole delocalization index (HDI), and electron delocalization index (EDI) (B3LYP/TZVP/IEFPCM).

|                                | D (Å)  | Sr      | H (Å) | t (Å) | HDI  | EDI   |
|--------------------------------|--------|---------|-------|-------|------|-------|
| <b>DAPH-DNP</b>                |        |         |       |       |      |       |
| S <sub>0</sub> →S <sub>1</sub> | 9.718  | 0.04367 | 3.244 | 7.112 | 8.16 | 11.96 |
| S <sub>0</sub> →S <sub>2</sub> | 11.644 | 0.07328 | 3.282 | 8.945 | 8.29 | 12.53 |
| S <sub>0</sub> →S <sub>3</sub> | 4.194  | 0.62668 | 3.924 | 0.842 | 8.45 | 7.42  |
| <b>DAPH</b>                    |        |         |       |       |      |       |
| S <sub>0</sub> →S <sub>1</sub> | 4.332  | 0.61323 | 4.031 | 0.547 | 8.11 | 7.66  |

**Table S7.** Contribution of different segments of DAPH-DNP to the electron orbitals from S<sub>0</sub> to S<sub>1</sub> state and S<sub>3</sub> state (B3LYP/TZVP/IEFPCM).

| Fragment             | Hole (%) | Electron (%) | Overlap (%) | Difference (%) |
|----------------------|----------|--------------|-------------|----------------|
| <b>S<sub>1</sub></b> |          |              |             |                |
| 1                    | 0.08     | 97.09        | 2.73        | 97.01          |
| 2                    | 1.01     | 3.08         | 1.76        | 2.07           |
| 3                    | 35.20    | -0.17        | 0.00        | -35.37         |
| 4                    | 63.72    | 0.00         | 0.22        | -63.72         |
| <b>S<sub>3</sub></b> |          |              |             |                |
| 1                    | 0.19     | 1.79         | 0.58        | 1.61           |
| 2                    | 2.18     | 12.56        | 5.24        | 10.38          |
| 3                    | 28.40    | 69.27        | 44.36       | 40.86          |
| 4                    | 69.22    | 16.38        | 33.67       | -52.85         |

**Table S8.** Contribution of different segments of DAPH to the electron orbitals from S<sub>0</sub> to S<sub>1</sub> state (B3LYP/TZVP/IEFPCM).

| Fragment | Hole (%) | Electron (%) | Overlap (%) | Difference (%) |
|----------|----------|--------------|-------------|----------------|
| 1        | 5.90     | 19.16        | 10.63       | 13.27          |
| 2        | 27.64    | 66.19        | 42.78       | 38.55          |
| 3        | 66.46    | 14.64        | 31.20       | -51.82         |

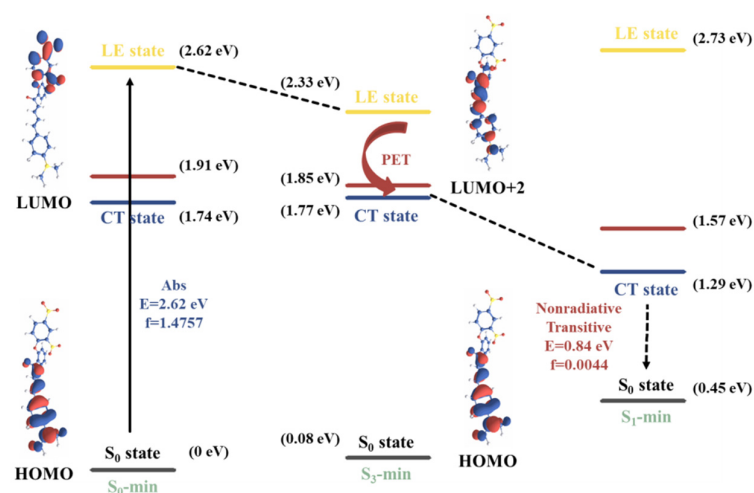

**Figure S1.** The B3LYP /TZVP/IEFPCM calculated energies of DAPH-DNP showing the PET mechanism.

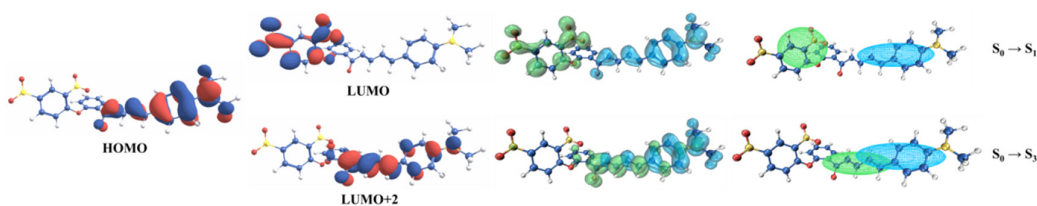

**Figure S2.** Excitation processes of DAPH-DNP (molecular orbitals are given in blue and red iso-surfaces, holes and electrons are given in blue and green iso-surfaces, respectively).

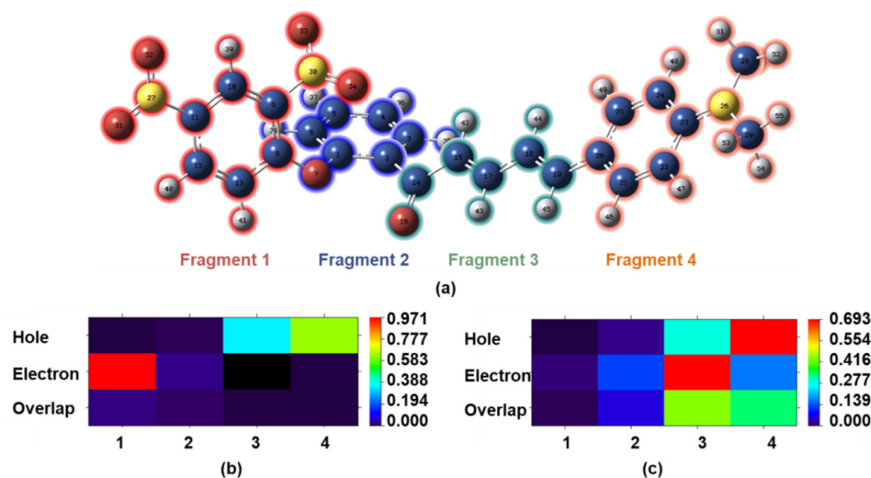

**Figure S3.** The IFCT analyzing the electron excitation process of DAPH-DNP molecular fragments (a), the amount of electron transfer between fragments from the  $S_0$  to  $S_1$  (b) and  $S_3$  states (c).

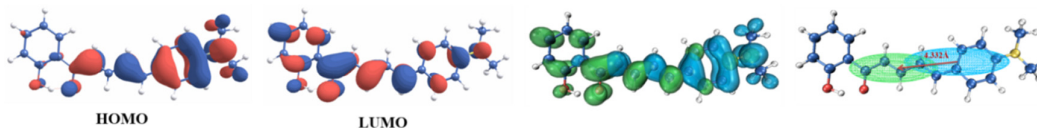

**Figure S4.** Frontier molecular orbitals showing the excitation process of DAPH.

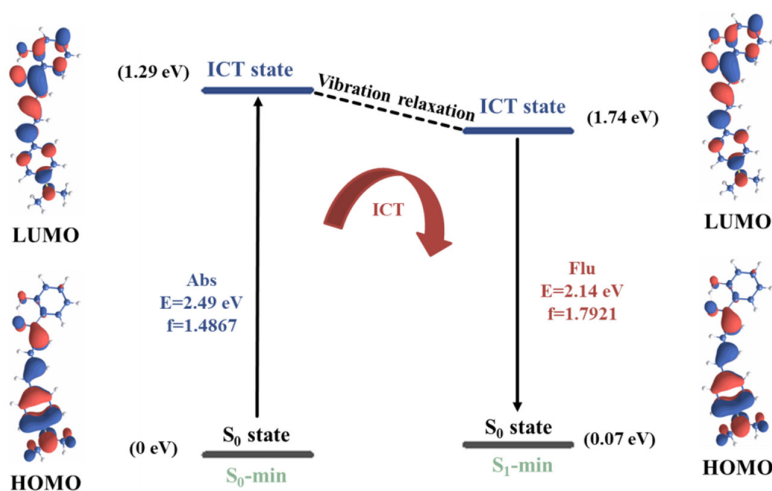

**Figure S5.** The B3LYP/TZVP/IEFPCM calculated energies of DAPH showing the ICT mechanism.

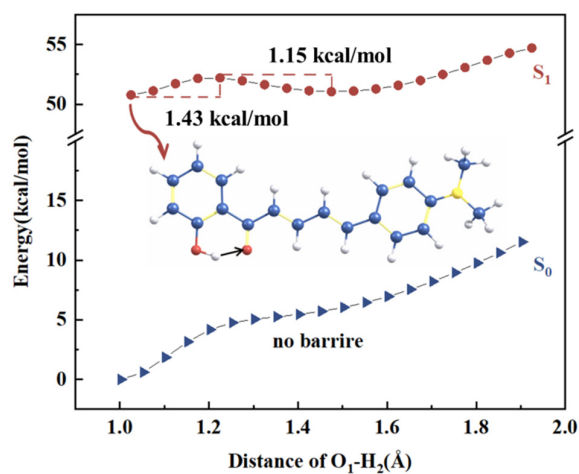

**Figure S6.** The PECs of the S<sub>0</sub> and S<sub>1</sub> states for DAPH along with the O<sub>1</sub>-H<sub>2</sub> bond length.

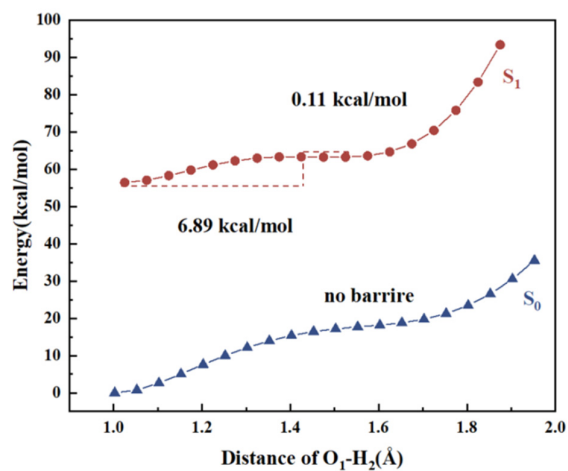

**Figure S7.** The PECs of the S<sub>0</sub> and S<sub>1</sub> states for DAPH along with the O<sub>1</sub>-H<sub>2</sub> bond length (rigid scan).

**B3LYP-D3(BJ)/TZVP/IEFPCM optimized geometries**DAPH-DNP     S<sub>0</sub>-min

| Atom | x         | y         | z         |
|------|-----------|-----------|-----------|
| C1   | -2.944084 | 1.935293  | -0.328902 |
| C2   | -1.634332 | 2.419932  | -0.299744 |
| C3   | -1.366685 | 3.520396  | 0.517650  |
| C4   | -2.368727 | 4.130162  | 1.262089  |
| C5   | -3.664125 | 3.629108  | 1.210933  |
| C6   | -3.954978 | 2.525908  | 0.416329  |
| C7   | -3.219975 | 0.845960  | -1.149620 |
| C8   | -4.134089 | -0.079270 | -0.777886 |
| C9   | -4.184879 | -0.704414 | 0.481019  |
| C10  | -5.172700 | -1.624445 | 0.785695  |
| C11  | -6.087169 | -1.961691 | -0.194697 |
| C12  | -6.042861 | -1.393203 | -1.463702 |
| C13  | -5.071847 | -0.451614 | -1.741738 |
| C14  | -0.538484 | 1.802499  | -1.120097 |
| C15  | 0.718066  | 1.554911  | -0.429788 |
| C16  | -0.726897 | 1.543726  | -2.310784 |
| C17  | 1.794045  | 1.024944  | -1.066713 |
| C18  | 3.044614  | 0.729577  | -0.457448 |
| C19  | 4.079656  | 0.191095  | -1.156105 |
| C20  | 5.389539  | -0.154192 | -0.672358 |
| C21  | 6.327559  | -0.722129 | -1.555260 |
| C22  | 7.598037  | -1.074814 | -1.153002 |
| C23  | 8.015099  | -0.876617 | 0.185891  |
| C24  | 7.074424  | -0.299645 | 1.079582  |
| C25  | 5.810584  | 0.044268  | 0.658220  |
| N26  | 9.264959  | -1.224183 | 0.601144  |
| N27  | -7.127879 | -2.946665 | 0.120334  |
| C28  | 9.683038  | -0.972812 | 1.972354  |
| C29  | 10.221472 | -1.783996 | -0.341674 |
| N30  | -3.170169 | -0.463129 | 1.515491  |
| O31  | -7.923644 | -3.241929 | -0.764298 |
| O32  | -7.148726 | -3.422495 | 1.250361  |
| O33  | -3.534685 | -0.484324 | 2.684283  |
| O34  | -2.015784 | -0.287658 | 1.149658  |
| H35  | -0.357384 | 3.908860  | 0.556980  |
| H36  | -2.138691 | 4.988961  | 1.878288  |
| H37  | -4.455261 | 4.093989  | 1.784251  |
| H38  | -4.962709 | 2.135041  | 0.371161  |
| H39  | -5.206992 | -2.083874 | 1.761060  |
| H40  | -6.770361 | -1.674763 | -2.209578 |

|     |           |           |           |
|-----|-----------|-----------|-----------|
| H41 | -5.029049 | 0.034628  | -2.705772 |
| H42 | 0.770509  | 1.779919  | 0.627923  |
| H43 | 1.691760  | 0.805048  | -2.126366 |
| H44 | 3.149453  | 0.949637  | 0.599853  |
| H45 | 3.910213  | -0.010044 | -2.211204 |
| H46 | 6.041573  | -0.887628 | -2.587634 |
| H47 | 8.274324  | -1.504946 | -1.875678 |
| H48 | 7.344992  | -0.122751 | 2.109354  |
| H49 | 5.131766  | 0.481181  | 1.379230  |
| H50 | 9.663939  | 0.094830  | 2.211296  |
| H51 | 9.043413  | -1.497074 | 2.687298  |
| H52 | 10.699383 | -1.332087 | 2.102234  |
| H53 | 9.848023  | -2.711031 | -0.784878 |
| H54 | 10.448676 | -1.083162 | -1.150896 |
| H55 | 11.144708 | -2.008629 | 0.183610  |

DAHP-DNP    Si-min

| Atom | x         | y         | z         |
|------|-----------|-----------|-----------|
| C1   | -2.988177 | 2.005253  | -0.120007 |
| C2   | -1.730915 | 2.621412  | -0.099879 |
| C3   | -1.485503 | 3.611733  | 0.853736  |
| C4   | -2.468956 | 4.003000  | 1.752546  |
| C5   | -3.706604 | 3.368970  | 1.727165  |
| C6   | -3.965556 | 2.366246  | 0.799856  |
| C7   | -3.221357 | 1.043024  | -1.073790 |
| C8   | -4.064228 | 0.001991  | -0.756681 |
| C9   | -3.793928 | -0.909086 | 0.292597  |
| C10  | -4.747393 | -1.893043 | 0.561133  |
| C11  | -5.882434 | -1.991285 | -0.225431 |
| C12  | -6.130682 | -1.135846 | -1.293725 |
| C13  | -5.203870 | -0.132891 | -1.536013 |
| C14  | -0.653135 | 2.190436  | -1.032626 |
| C15  | 0.661318  | 1.916400  | -0.417757 |
| C16  | -0.841880 | 2.044155  | -2.233695 |
| C17  | 1.676466  | 1.362454  | -1.126175 |
| C18  | 2.915804  | 1.008284  | -0.540541 |
| C19  | 3.918258  | 0.399082  | -1.255635 |
| C20  | 5.174700  | -0.013770 | -0.754279 |
| C21  | 6.091777  | -0.653401 | -1.634483 |
| C22  | 7.314413  | -1.081150 | -1.213593 |
| C23  | 7.718766  | -0.894601 | 0.145381  |
| C24  | 6.800964  | -0.249642 | 1.036094  |
| C25  | 5.582996  | 0.169192  | 0.598443  |
| N26  | 8.917137  | -1.309559 | 0.572501  |

|     |           |           |           |
|-----|-----------|-----------|-----------|
| N27 | -6.850251 | -3.049366 | 0.076924  |
| C28 | 9.332287  | -1.114271 | 1.964934  |
| C29 | 9.853028  | -1.974593 | -0.339153 |
| N30 | -2.623376 | -0.876163 | 1.077091  |
| O31 | -7.819329 | -3.179254 | -0.668272 |
| O32 | -6.657158 | -3.760826 | 1.060302  |
| O33 | -2.642642 | -1.465252 | 2.228742  |
| O34 | -1.536937 | -0.388326 | 0.580979  |
| H35 | -0.513536 | 4.087843  | 0.883828  |
| H36 | -2.266658 | 4.783587  | 2.473505  |
| H37 | -4.477564 | 3.650324  | 2.432913  |
| H38 | -4.924550 | 1.866928  | 0.786132  |
| H39 | -4.569426 | -2.577781 | 1.372716  |
| H40 | -7.023634 | -1.234486 | -1.888989 |
| H41 | -5.365871 | 0.588186  | -2.325200 |
| H42 | 0.780409  | 2.106747  | 0.640364  |
| H43 | 1.522643  | 1.157826  | -2.180681 |
| H44 | 3.047998  | 1.224063  | 0.512734  |
| H45 | 3.734205  | 0.203143  | -2.306716 |
| H46 | 5.802551  | -0.803314 | -2.666251 |
| H47 | 7.976556  | -1.562670 | -1.914623 |
| H48 | 7.071627  | -0.091941 | 2.067469  |
| H49 | 4.919149  | 0.650326  | 1.301831  |
| H50 | 9.351919  | -0.053068 | 2.212717  |
| H51 | 8.653649  | -1.631739 | 2.642900  |
| H52 | 10.328717 | -1.520609 | 2.090841  |
| H53 | 9.416049  | -2.892546 | -0.732078 |
| H54 | 10.114927 | -1.315505 | -1.166795 |
| H55 | 10.754306 | -2.223113 | 0.208197  |

DAHP-DNP S2-min

| Atom | x         | y         | z         |
|------|-----------|-----------|-----------|
| C1   | -2.988270 | 2.005340  | -0.120032 |
| C2   | -1.730970 | 2.621401  | -0.099935 |
| C3   | -1.485459 | 3.611646  | 0.853738  |
| C4   | -2.468817 | 4.002892  | 1.752661  |
| C5   | -3.706498 | 3.368928  | 1.727332  |
| C6   | -3.965563 | 2.366310  | 0.799934  |
| C7   | -3.221651 | 1.043273  | -1.073948 |
| C8   | -4.064297 | 0.002079  | -0.756735 |
| C9   | -3.793790 | -0.908997 | 0.292493  |
| C10  | -4.747154 | -1.893005 | 0.561118  |
| C11  | -5.882317 | -1.991377 | -0.225303 |
| C12  | -6.130719 | -1.135939 | -1.293563 |

|     |           |           |           |
|-----|-----------|-----------|-----------|
| C13 | -5.204008 | -0.132918 | -1.535950 |
| C14 | -0.653285 | 2.190342  | -1.032724 |
| C15 | 0.661232  | 1.916431  | -0.417928 |
| C16 | -0.842116 | 2.043943  | -2.233766 |
| C17 | 1.676313  | 1.362355  | -1.126347 |
| C18 | 2.915686  | 1.008266  | -0.540729 |
| C19 | 3.918095  | 0.398882  | -1.255725 |
| C20 | 5.174550  | -0.013924 | -0.754346 |
| C21 | 6.091546  | -0.653795 | -1.634458 |
| C22 | 7.314198  | -1.081499 | -1.213563 |
| C23 | 7.718676  | -0.894648 | 0.145345  |
| C24 | 6.800952  | -0.249452 | 1.035956  |
| C25 | 5.582969  | 0.169333  | 0.598298  |
| N26 | 8.917067  | -1.309433 | 0.572589  |
| N27 | -6.849991 | -3.049457 | 0.077196  |
| C28 | 9.332099  | -1.113671 | 1.964994  |
| C29 | 9.853129  | -1.974612 | -0.338809 |
| N30 | -2.623132 | -0.876047 | 1.076835  |
| O31 | -7.819376 | -3.179235 | -0.667621 |
| O32 | -6.656584 | -3.761113 | 1.060378  |
| O33 | -2.642237 | -1.465185 | 2.228464  |
| O34 | -1.536808 | -0.388041 | 0.580650  |
| H35 | -0.513481 | 4.087735  | 0.883799  |
| H36 | -2.266418 | 4.783434  | 2.473638  |
| H37 | -4.477392 | 3.650260  | 2.433160  |
| H38 | -4.924578 | 1.867034  | 0.786229  |
| H39 | -4.569020 | -2.577744 | 1.372663  |
| H40 | -7.023726 | -1.234636 | -1.888737 |
| H41 | -5.366153 | 0.588152  | -2.325109 |
| H42 | 0.780462  | 2.106963  | 0.640143  |
| H43 | 1.522416  | 1.157560  | -2.180808 |
| H44 | 3.047930  | 1.224264  | 0.512497  |
| H45 | 3.733992  | 0.202739  | -2.306762 |
| H46 | 5.802235  | -0.803932 | -2.666172 |
| H47 | 7.976254  | -1.563192 | -1.914547 |
| H48 | 7.071730  | -0.091492 | 2.067267  |
| H49 | 4.919210  | 0.650671  | 1.301629  |
| H50 | 9.352115  | -0.052353 | 2.212278  |
| H51 | 8.653146  | -1.630549 | 2.643086  |
| H52 | 10.328340 | -1.520372 | 2.091227  |
| H53 | 9.416245  | -2.892640 | -0.731653 |
| H54 | 10.115184 | -1.315659 | -1.166509 |
| H55 | 10.754305 | -2.223029 | 0.208757  |

---

DAPH-DNP     S<sub>3</sub>-min



| Atom | x         | y         | z         |
|------|-----------|-----------|-----------|
| C1   | -2.830816 | 1.812764  | -0.440837 |
| C2   | -1.471280 | 2.174789  | -0.458545 |
| C3   | -1.119764 | 3.308406  | 0.296922  |
| C4   | -2.055847 | 4.040058  | 1.010991  |
| C5   | -3.395423 | 3.661342  | 0.989604  |
| C6   | -3.780452 | 2.542908  | 0.256596  |
| C7   | -3.221966 | 0.690876  | -1.170994 |
| C8   | -4.231073 | -0.097185 | -0.746646 |
| C9   | -4.388151 | -0.595056 | 0.560958  |
| C10  | -5.475762 | -1.379721 | 0.904941  |
| C11  | -6.388487 | -1.717387 | -0.076767 |
| C12  | -6.243496 | -1.277329 | -1.389591 |
| C13  | -5.173059 | -0.467578 | -1.709960 |
| C14  | -0.453811 | 1.433962  | -1.244670 |
| C15  | 0.866758  | 1.322352  | -0.662954 |
| C16  | -0.735224 | 0.921907  | -2.356747 |
| C17  | 1.899249  | 0.648759  | -1.278210 |
| C18  | 3.181315  | 0.489879  | -0.701022 |
| C19  | 4.226593  | -0.184658 | -1.294415 |
| C20  | 5.534557  | -0.365051 | -0.740855 |
| C21  | 6.510871  | -1.091168 | -1.472010 |
| C22  | 7.779187  | -1.299124 | -0.993700 |
| C23  | 8.171153  | -0.785980 | 0.274924  |
| C24  | 7.200081  | -0.055259 | 1.016296  |
| C25  | 5.935963  | 0.143855  | 0.524421  |
| N26  | 9.423001  | -0.985833 | 0.759639  |
| N27  | -7.530382 | -2.560993 | 0.281179  |
| C28  | 9.805346  | -0.464049 | 2.065522  |
| C29  | 10.408929 | -1.733168 | -0.011003 |
| N30  | -3.393189 | -0.359107 | 1.613232  |
| O31  | -8.319431 | -2.868085 | -0.608402 |
| O32  | -7.642329 | -2.918068 | 1.451300  |
| O33  | -3.797919 | -0.245927 | 2.764624  |
| O34  | -2.215540 | -0.319311 | 1.284166  |
| H35  | -0.087643 | 3.631592  | 0.296246  |
| H36  | -1.744055 | 4.911182  | 1.572363  |
| H37  | -4.140446 | 4.230571  | 1.529291  |
| H38  | -4.819461 | 2.241608  | 0.230286  |
| H39  | -5.588489 | -1.738777 | 1.915749  |
| H40  | -6.970849 | -1.554918 | -2.137095 |
| H41  | -5.049445 | -0.080965 | -2.711414 |
| H42  | 1.038359  | 1.754572  | 0.315637  |
| H43  | 1.714908  | 0.213321  | -2.254940 |

|     |           |           |           |
|-----|-----------|-----------|-----------|
| H44 | 3.329571  | 0.938026  | 0.276833  |
| H45 | 4.055895  | -0.626289 | -2.271113 |
| H46 | 6.241202  | -1.494389 | -2.440172 |
| H47 | 8.479489  | -1.860409 | -1.592728 |
| H48 | 7.453260  | 0.353209  | 1.982381  |
| H49 | 5.234751  | 0.705274  | 1.125768  |
| H50 | 9.720283  | 0.625057  | 2.092264  |
| H51 | 9.175354  | -0.882673 | 2.854197  |
| H52 | 10.836097 | -0.735560 | 2.265035  |
| H53 | 10.074311 | -2.758660 | -0.186452 |
| H54 | 10.594643 | -1.256291 | -0.976230 |
| H55 | 11.340051 | -1.763254 | 0.544218  |

DA PH    So-min

| Atom | x         | y         | z         |
|------|-----------|-----------|-----------|
| C1   | 5.964294  | -0.476350 | -0.000890 |
| C2   | 4.700472  | 0.171764  | 0.000436  |
| C3   | 4.684522  | 1.578605  | 0.002303  |
| C4   | 5.851202  | 2.318642  | 0.002666  |
| C5   | 7.084337  | 1.659642  | 0.001116  |
| C6   | 7.141644  | 0.278384  | -0.000648 |
| O7   | 6.073459  | -1.817055 | -0.002373 |
| C8   | 3.468819  | -0.646355 | -0.000127 |
| O9   | 3.568608  | -1.901451 | -0.000375 |
| C10  | 2.168049  | -0.010950 | -0.000559 |
| C11  | 1.019384  | -0.738508 | -0.000377 |
| C12  | -0.291577 | -0.190262 | -0.000812 |
| C13  | -1.403261 | -0.974952 | -0.000003 |
| C14  | -2.779115 | -0.558619 | -0.000136 |
| C15  | -3.798141 | -1.530505 | 0.001492  |
| C16  | -5.135045 | -1.195649 | 0.001626  |
| C17  | -5.541842 | 0.161234  | 0.000103  |
| C18  | -4.518159 | 1.145713  | -0.001733 |
| C19  | -3.189298 | 0.790383  | -0.001765 |
| N20  | -6.857938 | 0.509754  | 0.000404  |
| C21  | -7.249844 | 1.911520  | -0.002922 |
| C22  | -7.888928 | -0.517233 | 0.002936  |
| H23  | 3.741020  | 2.103678  | 0.003610  |
| H24  | 5.808624  | 3.399411  | 0.004168  |
| H25  | 8.003664  | 2.231789  | 0.001357  |
| H26  | 8.088795  | -0.245183 | -0.001749 |
| H27  | 5.130122  | -2.156761 | -0.001774 |
| H28  | 2.104780  | 1.067013  | -0.001084 |
| H29  | 1.107229  | -1.821216 | 0.000200  |

|     |           |           |           |
|-----|-----------|-----------|-----------|
| H30 | -0.381852 | 0.890992  | -0.001696 |
| H31 | -1.246939 | -2.051003 | 0.000948  |
| H32 | -3.521726 | -2.578607 | 0.002649  |
| H33 | -5.871481 | -1.984489 | 0.002797  |
| H34 | -4.776103 | 2.193729  | -0.002992 |
| H35 | -2.448516 | 1.579481  | -0.003126 |
| H36 | -6.877320 | 2.430215  | -0.890777 |
| H37 | -8.333710 | 1.974473  | -0.003546 |
| H38 | -6.878035 | 2.434289  | 0.882853  |
| H39 | -7.818556 | -1.153491 | 0.889789  |
| H40 | -8.863664 | -0.039139 | 0.004869  |
| H41 | -7.822377 | -1.154428 | -0.883587 |

DA PH    Si-min

| Atom | x         | y         | z         |
|------|-----------|-----------|-----------|
| C1   | -5.955057 | -0.381417 | 0.000343  |
| C2   | -4.644698 | 0.193788  | -0.000182 |
| C3   | -4.562591 | 1.604291  | -0.000625 |
| C4   | -5.691009 | 2.401438  | -0.000450 |
| C5   | -6.961914 | 1.814264  | 0.000139  |
| C6   | -7.088173 | 0.433411  | 0.000531  |
| O7   | -6.115393 | -1.716699 | 0.000689  |
| C8   | -3.484437 | -0.694490 | -0.000238 |
| O9   | -3.663347 | -1.972006 | -0.000218 |
| C10  | -2.151083 | -0.162678 | -0.000183 |
| C11  | -1.023371 | -0.953947 | -0.000221 |
| C12  | 0.290409  | -0.426069 | -0.000129 |
| C13  | 1.436918  | -1.187429 | -0.000114 |
| C14  | 2.780072  | -0.688880 | -0.000048 |
| C15  | 3.865946  | -1.601750 | 0.000046  |
| C16  | 5.172932  | -1.185036 | 0.000070  |
| C17  | 5.493949  | 0.201463  | 0.000006  |
| C18  | 4.411310  | 1.125886  | -0.000023 |
| C19  | 3.110466  | 0.692809  | -0.000067 |
| N20  | 6.782626  | 0.626318  | -0.000029 |
| C21  | 7.095478  | 2.049851  | 0.000905  |
| C22  | 7.881141  | -0.331872 | -0.000482 |
| H23  | -3.593765 | 2.082687  | -0.001149 |
| H24  | -5.589591 | 3.478998  | -0.000808 |
| H25  | -7.848743 | 2.435391  | 0.000283  |
| H26  | -8.061577 | -0.040832 | 0.000955  |
| H27  | -5.157892 | -2.082613 | 0.000382  |
| H28  | -2.017229 | 0.910742  | -0.000068 |
| H29  | -1.147849 | -2.031356 | -0.000326 |

|     |          |           |           |
|-----|----------|-----------|-----------|
| H30 | 0.375797 | 0.656401  | -0.000063 |
| H31 | 1.328469 | -2.267478 | -0.000154 |
| H32 | 3.652804 | -2.663556 | 0.000134  |
| H33 | 5.958845 | -1.924391 | 0.000249  |
| H34 | 4.607123 | 2.186956  | -0.000104 |
| H35 | 2.323912 | 1.434523  | -0.000148 |
| H36 | 6.688204 | 2.540278  | 0.888409  |
| H37 | 8.172865 | 2.173273  | 0.001590  |
| H38 | 6.689218 | 2.541255  | -0.886538 |
| H39 | 7.845266 | -0.968919 | -0.887578 |
| H40 | 8.820723 | 0.209880  | -0.001962 |
| H41 | 7.847245 | -0.967632 | 0.887657  |

---
